# Supplementary material for: Clinical Application of Diagnostic Imaging of Chiari-Like Malformation and Syringomyelia
Source: PubMed Central journal article supplement (PMC6279941; doi:10.3389/fvets.2018.00280), 2018-11-28
Supplement: Table_1.pdf [file Table_1.pdf]

## SYRINGOMYELIA MRI PARAMETERS

### ROUTINE

| <b>T2 Sagittal Brain</b> |           |
|--------------------------|-----------|
| Field Of View (mm)       | 170 x 170 |
| Slice Thickness (mm)     | 2.7       |
| Slice Gap (%)            | 20        |
| Repetition Time (ms)     | 2380      |
| Echo Time (ms)           | 99        |
| Flip Angle (°)           | 150       |
| Image Matrix             | 266 x 320 |
| Bandwidth (Hz/Px)        | 80        |
| Scan Time (min:sec)      | 4:35      |

| <b>T1 Sagittal Brain</b> |           |
|--------------------------|-----------|
| Field Of View (mm)       | 170 x 170 |
| Slice Thickness (mm)     | 2.7       |
| Slice Gap (%)            | 20        |
| Repetition Time (ms)     | 400       |
| Echo Time (ms)           | 14        |
| Flip Angle (°)           | 80        |
| Image Matrix             | 240 x 320 |
| Bandwidth (Hz/Px)        | 100       |
| Scan Time (min:sec)      | 4:52      |

| <b>T2 Transverse Brain</b> |           |
|----------------------------|-----------|
| Field Of View (mm)         | 140 x 98  |
| Slice Thickness (mm)       | 3.5       |
| Slice Gap (%)              | 10        |
| Repetition Time (ms)       | 3470      |
| Echo Time (ms)             | 95        |
| Flip Angle (°)             | 150       |
| Image Matrix               | 186 x 320 |
| Bandwidth (Hz/Px)          | 65        |
| Scan Time (min:sec)        | 4:08      |

| <b>T1 Transverse Brain</b> |           |
|----------------------------|-----------|
| Field Of View (mm)         | 140 x 98  |
| Slice Thickness (mm)       | 3.5       |
| Slice Gap (%)              | 10        |
| Repetition Time (ms)       | 466       |
| Echo Time (ms)             | 14        |
| Flip Angle (°)             | 90        |
| Image Matrix               | 157 x 320 |
| Bandwidth (Hz/Px)          | 100       |
| Scan Time (min:sec)        | 3:13      |

| <b>T2 Sagittal Spine</b> |           |
|--------------------------|-----------|
| Field Of View (mm)       | 260 x 260 |
| Slice Thickness (mm)     | 1.5       |
| Slice Gap (%)            | 10        |
| Repetition Time (ms)     | 3990      |
| Echo Time (ms)           | 105       |
| Flip Angle (°)           | 180       |
| Image Matrix             | 358 x 448 |
| Bandwidth (Hz/Px)        | 151       |
| Scan Time (min:sec)      | 5:09      |

| <b>T1 Sagittal Spine</b> |           |
|--------------------------|-----------|
| Field Of View (mm)       | 260 x 260 |
| Slice Thickness (mm)     | 1.5       |
| Slice Gap (%)            | 10        |
| Repetition Time (ms)     | 450       |
| Echo Time (ms)           | 12        |
| Flip Angle (°)           | 150       |
| Image Matrix             | 326 x 384 |
| Bandwidth (Hz/Px)        | 191       |
| Scan Time (min/sec)      | 3:22      |

| <b>T2 Transverse Spine</b> |            |
|----------------------------|------------|
| Field Of View (mm)         | 130 x 91.4 |
| Slice Thickness (mm)       | 3.0        |
| Slice Gap (%)              | 10         |
| Repetition Time (ms)       | 5200       |
| Echo Time (ms)             | 101        |
| Flip Angle (°)             | 150        |
| Image Matrix               | 189 x 384  |
| Bandwidth (Hz/Px)          | 161        |
| Scan Time (min:sec)        | 5:40       |

## **EXTRAS**

| <b>MPRAGE Dorsal Brain</b> |           |
|----------------------------|-----------|
| Field Of View (mm)         | 180 x 135 |
| Slice Thickness (mm)       | 0.7       |
| Slice Gap (%)              | 50        |
| Repetition Time (ms)       | 2200      |
| Echo Time (ms)             | 3.48      |
| Flip Angle (°)             | 8         |
| Image Matrix               | 192 x 256 |
| Bandwidth (Hz/Px)          | 150       |
| Scan Time (min:sec)        | 5:07      |

| <b>T2 FLAIR Transverse Brain</b> |            |
|----------------------------------|------------|
| Field Of View (mm)               | 140 x 85.3 |
| Slice Thickness (mm)             | 3.0        |
| Slice Gap (%)                    | 10         |
| Repetition Time (ms)             | 8500       |
| Echo Time (ms)                   | 122        |
| Flip Angle (°)                   | 150        |
| Image Matrix                     | 140 x 256  |
| Bandwidth (Hz/Px)                | 181        |
| Scan Time (min:sec)              | 4:17       |

| <b>CISS Transverse Spine</b> |             |
|------------------------------|-------------|
| Field Of View (mm)           | 170 x 106.3 |
| Slice Thickness (mm)         | 1.0         |
| Slice Gap (%)                | 20          |
| Repetition Time (ms)         | 11.5        |
| Echo Time (ms)               | 5.75        |
| Flip Angle (°)               | 70          |
| Image Matrix                 | 160 x 256   |
| Bandwidth (Hz/Px)            | 130         |
| Scan Time (min:sec)          | 5:48        |

| <b>HASTE Sagittal Spine</b> |           |
|-----------------------------|-----------|
| Field Of View (mm)          | 320 x 320 |
| Slice Thickness (mm)        | 50.0      |
| Slice Gap (%)               | 50        |
| Repetition Time (ms)        | 8000      |
| Echo Time (ms)              | 1200      |
| Flip Angle (°)              | 150       |
| Image Matrix                | 369 x 512 |
| Bandwidth (Hz/Px)           | 465       |
| Scan Time (min:sec)         | 0:18      |
